# Supplementary material for: Nickel mine soil is a potential source for soybean plant growth promoting and heavy metal tolerant rhizobia
Source: PeerJ. 2022 Apr 21;10:e13215. doi: 10.7717/peerj.13215 (PMC9035279; doi:10.7717/peerj.13215)
Supplement: Supplemental Information 6 — Nickel mine soil basic properties, soybean growth, and the resistant ability of symbiotic rhizobia strains against five heavy metals. [file peerj-10-13215-s006.xlsx]

## Sheet: nickel mine soil
	pH	WC(%)	OM(%)	TN (mg kg-1)	AN (mg kg-1)	TP (mg kg-1)	AP (mg kg-1)	TK (mg kg-1)	AK (mg kg-1)	Cd(mg Kg-1)	Cr(mg Kg-1)	Cu(mg Kg-1)	Fe(mg Kg-1)	Ni(mg Kg-1)	Pb(mg Kg-1)	Zn(mg Kg-1)
SN-1	6.36	0.0780217	1.0598	241.477	39.24	471.608	139.179	6407.99	25.2097	0.4592	12.78	9.89813	740.129	19.69	20.1609	79.0279
SN-2	6.35	0.0774063	1.13765	256.423	42.2343	440.679	142.049	5604.85	25.1953	0.458202	12.8601	9.79	744.2	19.2509	20.1302	80.0713
SN-3	6.34	0.0757725	1.01352	286.155	36.146	527.274	140.852	5596.35	20.1679	0.450198	12.6982	9.69183	748.324	20.1242	20.1013	81.0981

## Sheet: soybean growth
	biomass	shoot				root
		length	nitrogen content	phosphurous content	potassium content	length	nitrogen content	phosphurous content	potassium content
N- 1-1	0.74	46	31.724	0.165	2.08065	44	37.9077	0.475	3.76861
N- 1-2	1.07	45.9	33.88	0.24915	2.04032	35	16.72	0.238905	3.14516
N- 2-1	1.26	49.5	39.732	0.139144	2	57.3	37.5941	0.308059	3.94924
N- 2-2	0.97	50.4	90.2	0.563774	5.24194	76.6	24.332	0.31	1.43548
N- 3-1	0.7	53.7	33.572	0.230603	2.28226	28	58.1778		2.37455
N- 3-2	1	49	53.2757	0.633276	4.22842	56	16.016	0.256878	2.52419
N+ 1-1	2.47	65	140.14	0.234	2.92742	57.3	113.157	0.134736	3.79558
N+ 1-2	2.21	71	129.976	0.148318	3.37097	59	100.348	0.176	3.94121
N+ 2-1	2.73	62.5	149.688	0.221329	3.53226	44.5	92.0652	0.231	4.05856
N+ 2-2	2.13	58.5	133.364	0.146	3.25	62.5	141.9	0.166151	4.6515
N+ 3-1	2.74	66.5	106.26	0.238	3.81452	54.5	86.24	0.222875	3.85484
N+ 3-2	2.81	62	94.248	0.258423	3.33065	61	111.774	0.252281	4.72164
YN1-1-1	1.63	67	99.176	0.253208	2.16129	59	64.4	0.138	3.35411
YN1-1-2	1.64	74	108.724	0.265728	2.40323	70	63.4667	0.578081	2.72483
YN1-2-1	0.79	59.5	86.856	0.248	2.04032	82	59.1684	0.211	4.52037
YN1-2-2	0.93	79	46.816	0.251643	2.08065	75	57.75	0.243545	4.86391
YN1-3-1	1.1	73.5	86.856	0.342	2.16129	83.5	48.2533	0.314	2.99731
YN1-3-2	1.32	65.8	77.924	0.353365	0.951613	73	53.35	0.320814	4.57949
YN5-1-1	1.22	88	101.64	0.242254	0.870968	67	40.2769	0.0565788	5.7072
YN5-1-2	2.35	74.8	126.896	0.241	2.40323	65.9	52.8595	0.23	3.95597
YN5-2-1	2.75	66	102.256	0.198	2.84677	68.5	53.284	0.219	2.80645
YN5-2-2	1.65	61	128.436	0.220344	2.76613	69	74.8759	0.223409	5.1168
YN5-3-1	2.41	81	78.848	0.142097	2.60484	32	58.2522	0.179969	3.13815
YN5-3-2	1.37	81	118.58	0.266	2.48387	40	50.1742	0.245	4.39646
YN8-1-1	3.77	71	83.16	0.304851	2.28226	72	66.22	0.19687	3.85484
YN8-1-2	1.95	75	91.476	0.219	2.72581	81	161.7	0.234	6.81452
YN8-2-1	2.24	67	117.964	0.315	2.64516	81	72.688	0.276	3.81452
YN8-2-2	2.06	52	97.02	0.299	2.56452	72.8	102.667	0.31	5.76277
YN8-3-1	1.82	63	118.272	0.207825	2.80645	70	75.5333	0.338326	4.08986
YN8-3-2	2.14	79	119.504	0.232	2.8871	77	80.3687	0.269	5.33014
YN10-1-1	2.74	78	130.592	0.346	3.20968	95.5	69.08	0.133	4.35484
YN10-1-2	2.21	74.5	107.492	0.403	3.04839	64	91.2154	0.321	7.07196
YN10-2-1	2.12	58	108.416	0.318936	2.92742	80	66.22	0.16784	4.1129
YN10-2-2	2.13	56	126.28	0.317371	2.8871	75	70.84	0.390715	3.93817
YN10-3-1	2.43	90	123.508	0.312676	3.12903	82	36.4341	0.0721402	2.53737
YN10-3-2	1.57	98	116.424	0.324	2.96774	84	75.1882	0.157	4.69639
YN11-1-1	1.42	69.5	82.544	0.361189	2.24194	66	94.9667	0.116067	2.62097
YN11-1-2	2.72	72.5	117.348	0.244	2.60484	83	62.6043	0.248	1.38499
YN11-2-1	1.53	91.5	134.904	0.227512	3.12903	89	59.9789	0.253501	4.30815
YN11-2-2	2.99	76	101.64	0.282875	2.8871	84	70.2625	0.248	2.50336
YN11-3-1	2.49	78	113.344	0.340845	2.40323	97	65.8596	0.257717	3.45745
YN11-3-2	2.08	80	106.26	0.417431	2.28226	60	80.5538	0.220536	2.06266
YN13-1-1	0.85	75	42.812	0.519878	2.20161	82.5	83.16	0.300714	4.1129
YN13-1-2	0.93	53	42.812	0.227829	2.24194	75	52.8957	0.66931	5.92567
YN13-2-1	1.17	53	40.04	0.276758	2.32258	68.5	50.6	0.491481	4.06682
YN13-2-2	1.82	64.5	31.416	0.249235	1.95968	76	51.744	0.29052	3.85484
YN13-3-1	0.98	51	43.12	0.230887	2.60484	85.5	104.948	0.641708	3.77838
YN13-3-2	1.1	53	36.96	0.236785	2.44355	81	63.8647	0.910685	5.1945
YN27-1-1	1.11	58	31.108	0.308869	2.60484	87	46.6968	0.448851	4.20135
YN27-1-2	0.97	51	49.896	0.539722	2.28226	79	40.4963	0.52101	4.2264
YN27-2-1	0.97	49	30.184	0.290767	1.79839	58	41.0667	0.360683	4.28187
YN27-2-2	0.81	60	32.34	0.405255	1.67742	43.5	82.4353	0.238424	6.83112
YN27-3-1	1.03	75	48.356	0.259939	2.20161	76	71.5647	0.737543	8.13567
YN27-3-2	0.77	47	35.728	0.149847	1.71774	70	58.3	0.294889	5.27074
YN30-1-1	0.74	45.5	27.72	0.191963	1.95968	64	43.4824	0.519138	3.86622
YN30-1-2	1.51	52.3	36.036	0.235474	1.83871	67	47.9111	0.30431	4.19355
YN30-2-1	1.05	59.5	44.968	0.235474	2.08065	60	89.1917	0.226043	4.50269
YN30-2-2	0.93	53.5	29.568	0.397554	2	85.4	37.1	0.205032	3.81232
YN30-3-1	1.06	45	40.964	0.189602	1.95968	71	52.9375	0.207856	3.062
YN30-3-2	1.39	51	34.188	0.172783	2.08065	75	41.9222	0.276079	4.00986

## Sheet: heavy metal resistant ability
OD600nm-Cd
Strains		0ppm	4ppm	8ppm	12ppm	16ppm	20ppm	40ppm	60ppm	80ppm	100ppm
YN5		0.931	0.942	0.794	0.782	0.597	0.728	0.496	0.46	0.145	0.014
		1.022	0.898	0.797	0.836	0.59	0.712	0.516	0.428	0.153	0.015
		0.911	0.974	0.748	0.706	0.594	0.726	0.473	0.415	0.144	0
YN8		1.063	0.014	0.017	0.02	0.017	0.002	0.021	0.017	0.016	0.025
		1.042	0.026	0.01	0.009	0.018	0.014	0.016	0.009	0.024	0.017
		1.048	0.02	0.016	0.014	0.009	0.013	0.014	0.008	0.018	0.008
YN10		1.13	0.026	0.021	0.008	0.019	0.012	0.031	0.006	0.022	0.02
		1.113	0.008	0.014	0.005	0.021	0.021	0.026	0.015	0.021	0.018
		1.11	0.014	0.017	0.01	0.009	0.007	0.004	0.014	0.009	0.008
YN11		0.939	0.945	0.888	0.853	0.684	0.857	0.568	0.21	0.146	0.051
		0.934	0.944	0.828	0.872	0.683	0.814	0.556	0.207	0.172	0.037
		0.941	0.941	0.829	0.815	0.703	0.856	0.575	0.243	0.146	0.05
OD600nm-Cr
Strains		0ppm	4ppm	8ppm	12ppm	16ppm	20ppm	40ppm	60ppm	80ppm	100ppm
YN5		1.198	0.973	0.548	0.232	0.061	0.067	0.032	0.034	0.019	0.011
		1.111	0.963	0.608	0.145	0.095	0.064	0.012	0.06	0.027	0.024
		1.16	0.967	0.541	0.141	0.064	0.07	0.004	0.025	0.016	0.016
YN8		1.2	0.61	0.257	0.23	0.011	0.014	0.042	0.006	0.042	0.002
		1.107	0.612	0.343	0.131	0.009	0.022	0.037	0.043	0.005	0.013
		1.115	0.619	0.267	0.13	0.08	0.01	0.004	0.03	0.017	0.015
YN10		1.081	1.024	0.963	0.348	0.038	0.03	0.041	0.048	0.008	0.003
		1.084	1.082	0.982	0.433	0.033	0.004	0.036	0.022	0.019	0.02
		1.156	1.027	0.97	0.349	0.069	0.01	0.001	0.01	0.007	0.011
YN11		1.281	1.381	0.872	0.384	0.047	0.03	0.02	0.05	0.034	0.035
		1.264	1.36	0.833	0.47	0.03	0.019	0.072	0.042	0.019	0.0667
		1.275	1.377	0.87	0.456	0.05	0.031	0.025	0.07	0.062	0.048
OD600nm-Cu
Strains		0ppm	4ppm	8ppm	12ppm	16ppm	20ppm	40ppm	60ppm	80ppm	100ppm
YN5		1.123	1.212	1.124	1.002	0.866	0.822	0.553	0.075	0.082	0.054
		1.161	1.212	1.148	0.949	0.843	0.765	0.527	0.017	0.079	0.083
		1.133	1.28	1.147	0.985	0.878	0.836	0.57	0.082	0.025	0.021
YN8		1.164	0.972	0.733	0.919	0.286	0.074	0.065	0.037	0.07	0.003
		1.187	0.964	0.765	0.923	0.232	0.046	0.004	0.007	0.01	0.01
		1.196	0.938	0.757	0.881	0.287	0.016	0.069	0.068	0.074	0.064
YN10		1.234	1.191	1.075	0.572	0.656	0.471	0.07	0.068	0.045	0.076
		1.232	1.193	1.145	0.517	0.614	0.416	0.01	0.039	0.012	0.016
		1.204	1.172	1.128	0.545	0.684	0.445	0.07	0.01	0.076	0.072
YN11		1	1.071	1.056	0.688	0.635	0.577	0.18	0.018	0.012	0.016
		0.994	1.172	1.06	0.751	0.671	0.559	0.175	0.025	0.076	0.072
		1.038	1.14	1.065	0.738	0.653	0.613	0.242	0.031	0.01	0.01
OD600nm-Ni
Strains		0ppm	4ppm	8ppm	12ppm	16ppm	20ppm	40ppm	60ppm	80ppm	100ppm
YN5		1.043	1.126	1.04	0.989	0.952	0.923	0.067	0.047	0.017	0.055
		1.082	1.093	1.023	0.955	0.943	0.87	0.022	0.075	0.014	0.022
		1.0625	1.095	1.044	0.974	0.898	0.925	0.068	0.013	0.007	0.024
YN8		1.19	1.207	0.167	0.069	0.047	0.017	0.055	0.008	0.012	0.021
		1.119	1.16	0.098	0.025	0.075	0.014	0.022	0.017	0.019	0.021
		1.1545	1.18	0.135	0.048	0.013	0.007	0.024	0.004	0.041	0.028
YN10		1.112	1.146	1.071	0.08	0.037	0.055	0.008	0.012	0.012	0.019
		1.038	1.092	1.054	0.032	0.066	0.022	0.012	0.019	0.012	0
		1.075	1.182	1.104	0.056	0.096	0.024	0.004	0.041	0.022	0
YN11		0.969	0.854	0.731	0.588	0.108	0.108	0.008	0.012	0	0.019
		1.009	0.798	0.737	0.565	0.15	0.188	0.012	0.019	0.017	0.012
		0.96	0.717	0.67	0.482	0.19	0.135	0.021	0.012	0.014	0
OD600nm-Zn
Strains		0ppm	4ppm	8ppm	12ppm	16ppm	20ppm	40ppm	60ppm	80ppm	100ppm	120ppm	140ppm	160ppm	180ppm	200ppm	220ppm	240ppm	260ppm	280ppm	300ppm
YN5		1.222	1.119	1.221	1.337	1.348	1.395	1.382	1.248	1.061	1.042	1.029	1.04	1.063	1.01	1.098	0.814	0.724	0.593	0.414	0.049
		1.187	1.156	1.124	1.314	1.277	1.404	1.342	1.184	1.075	1.086	1.014	1.017	1.062	1	1.001	0.8	0.717	0.589	0.41	0.052
		1.211	1.196	1.271	1.341	1.255	1.37	1.314	1.181	1.107	1.03	1.019	1.026	1.066	1.018	1.006	0.798	0.718	0.591	0.416	0.052
YN8		1.252	0.034	0.015	0.028	0.009	0.027	0.04	0.018	0.027	0.014
		1.301	0.077	0.028	0.034	0.014	0.019	0.011	0.02	0.013	0.009
		1.258	0.009	0.0072	0.014	0.019	0.03	0.012	0.025	0.018	0.007
YN10		1.138	0.591	0.558	0.479	0.005	0.017	0.055	0.008	0.012	0.021
		1.182	0.597	0.511	0.526	0.084	0.014	0.022	0.017	0.019	0.021
		1.128	0.634	0.536	0.454	0.03	0.007	0.024	0.004	0.041	0.028
YN11		0.802	0.728	0.759	0.865	0.775	0.839	0.229	0.204	0.075	0.088
		0.855	0.753	0.806	0.785	0.766	0.814	0.257	0.178	0.066	0.127
		0.907	0.728	0.799	0.837	0.792	0.879	0.191	0.22	0.084	0.081
