# Supplementary material for: Nickel mine soil is a potential source for soybean plant growth promoting and heavy metal tolerant rhizobia
Source: PeerJ. 2022 Apr 21;10:e13215. doi: 10.7717/peerj.13215 (PMC9035279; doi:10.7717/peerj.13215)
Supplement: Supplemental Information 7 [file peerj-10-13215-s007.xls]

## Sheet: 1 or 0
	YN1	YN7	YN11	YN20	YN23	YN27	YN30	YN31	YN5	YN8	YN9	YN10	YN12	YN13	YN15	YN16	YN18	YN22	YN24	YN26	YN28
	0	0	0	0	0	0	1	1	1	0	0	0	0	0	0	0	0	0	0	0	0
	0	0	0	0	0	0	1	1	1	1	1	0	1	1	1	1	1	1	1	1	1
	1	0	1	1	1	1	1	1	1	1	1	1	1	1	1	1	1	1	1	1	1
	1	0	1	1	1	1	1	1	1	1	1	0	1	1	1	1	0	1	1	1	1
	1	1	1	1	1	1	1	1	1	1	1	1	1	1	1	1	1	1	1	1	1
	1	1	1	1	1	1	1	1	1	1	1	1	1	1	1	1	1	1	1	1	1
	1	1	1	1	1	1	1	1	0	0	0	0	0	1	0	0	0	0	0	0	1
	1	1	1	1	1	1	1	1	0	1	1	1	1	1	1	1	1	1	1	1	1
	1	0	1	1	1	0	1	0	1	1	1	1	1	1	1	1	1	1	1	1	1
	1	1	1	1	1	1	1	1	1	1	1	1	1	1	1	1	1	1	1	1	1
	1	1	1	1	1	1	0	0	0	0	0	1	0	1	1	0	1	0	0	0	1
	1	1	1	1	1	1	1	1	1	1	1	1	1	1	1	1	1	1	1	1	1
	0	0	1	1	1	0	0	0	1	1	0	1	1	0	1	0	1	1	1	0	1
	0	1	1	0	1	0	0	0	1	1	1	1	1	1	1	1	1	1	1	0	1
	1	1	1	1	1	1	1	1	0	0	0	0	0	0	0	0	0	0	0	0	0
	1	1	1	1	1	1	1	1	1	1	1	1	1	1	1	1	1	1	1	1	1
	0	0	0	0	0	0	0	0	1	1	1	1	1	1	1	1	0	1	1	1	1
